# Supplementary material for: Population pharmacokinetics of sirolimus in pediatric patients with kaposiform hemangioendothelioma: A retrospective study
Source: PubMed Central journal article supplement — Oncol Lett. 2019 Jul 4;18(3):2412–9. doi: 10.3892/ol.2019.10562 (PMC6676569; doi:10.3892/ol.2019.10562), 2019-07-04
Supplement: Supplementary_Data.pdf [file Supplementary_Data.pdf]

Table SI. Data regarding erythrocytes.

| Patient | Treatment | Erythrocytes ( $\times 10^{12}/l$ ) |
|---------|-----------|-------------------------------------|
| No. 1   | Before    | 5.09                                |
|         | After     | 5.64                                |
| No. 2   | Before    | 6.22                                |
|         | After     | 6.4                                 |
| No. 3   | Before    | 2.88                                |
|         | After     | 5.22                                |
| No. 4   | Before    | 2.91                                |
|         | After     | 4.92                                |
| No. 5   | Before    | 3.05                                |
|         | After     | 4.89                                |
| No. 6   | Before    | 4.47                                |
|         | After     | 4.47                                |
| No. 7   | Before    | 3.98                                |
|         | After     | 5.3                                 |
| No. 8   | Before    | 3.04                                |
|         | After     | 4.85                                |
| No. 9   | Before    | 3.85                                |
|         | After     | 4.46                                |
| No. 10  | Before    | 4.35                                |
|         | After     | 4.56                                |
| No. 11  | Before    | 3.86                                |
|         | After     | 4.32                                |
| No. 12  | Before    | 3.69                                |
|         | After     | 5.84                                |
| No. 13  | Before    | 2.34                                |
|         | After     | 3.71                                |
| No. 14  | Before    | 3.95                                |
|         | After     | 3.95                                |
| No. 15  | Before    | 4.88                                |
|         | After     | 4.92                                |
| No. 16  | Before    | 2.87                                |
|         | After     | 5.14                                |
| No. 17  | Before    | 5.34                                |
|         | After     | 5.42                                |
